# Supplementary material
Source: PubMed Central journal article supplement (PMC4385470)
Supplement: NIHMS669914-supplement-01.pdf [file NIHMS669914-supplement-01.pdf]

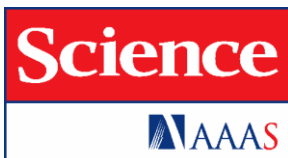

## Supplementary Materials for

### **Epigenetic inheritance uncoupled from sequence-specific recruitment**

Kaushik Raganathan, Gloria Jih, Danesh Moazed\*

\*Corresponding author: danesh@hms.harvard.edu

Published 20 November 2014 on *Science Express*

DOI: 10.1126/science.1258699

**This PDF file includes:**

Materials and Methods

Figs. S1 to S7

Tables S1 and S2

Full Reference List

## Materials and Methods

### Plasmids

Plasmids containing 10X*tetO* binding sites upstream of *ade6*<sup>+</sup> and *ura4-GFP* reporter genes were constructed by first synthesizing a plasmid containing 10 *tetO* sites flanked by 200bp homology sequences to facilitate reporter insertion at the *ura4* locus. The reporter genes were cloned downstream of the *tetO* binding sites using *PacI* and *AscI* restriction sites that were incorporated during the initial synthesis of the plasmid. The *ade6*<sup>+</sup> reporter construct consists of the full-length wild type *ade6*<sup>+</sup> gene with endogenous upstream promoter and downstream terminator sequences. The *ura4-GFP* reporter consists of the full length *ura4*<sup>+</sup> gene fused at the C terminus with a monomeric yeast codon optimized GFP using Gibson assembly (54). This construct was subsequently cloned downstream of the 10 *tetO* sites and appended with a 114bp *ura4* promoter element and the corresponding endogenous *ura4* downstream terminator sequence. The plasmid containing *TetR-clr4-I* was constructed by modifying a pFA6a-natMX6-P<sub>nmt1</sub> plasmid. The promoter elements in the original plasmid were replaced with the endogenous *clr4*<sup>+</sup> promoter (using *BglIII* and *PacI* restriction sites). The TetR construct consists of an N-terminal SV40 nuclear localization sequence followed immediately by a 2X-FLAG tag. The *clr4*<sup>+</sup> chromodomain deletion construct consists of a *clr4* allele lacking amino acids 7-59. The synthesis of the *TetR-clr4-I* fusion with the upstream endogenous *clr4* promoter elements was achieved by Gibson assembly. The deletion of the TetR DNA binding element was achieved after modifying a pFA6a-hphMX6-P<sub>nmt1</sub> plasmid by insertion of the endogenous *clr4*<sup>+</sup> promoter and a *clr4* allele lacking the chromodomain.

## Strains

A strain containing the 10 *tetO* sites was first made by insertion of the reporter gene at the *ura4*<sup>+</sup> locus. The subsequent introduction of the TetR-Clr4-I fusion protein was achieved using a PCR-based gene targeting approach (55). Strains with the designation TetR-Clr4-I are those in which the endogenous copy of *clr4* is replaced with the TetR-Clr4-I fusion making it the only source of Clr4 expression in the cells. In strains where the wild type copy of *clr4*<sup>+</sup> is intact, i.e. *TetR-clr4-I,clr4*<sup>+</sup>, the fusion protein is inserted at the *trp1*<sup>+</sup> locus. The deletions of the various RNAi and chromatin components was achieved either by PCR-based gene targeting approaches or by a cross followed by random spore analysis and PCR based screening to select for colonies that harbored the reporter gene, the TetR fusion protein and the appropriate deletion. Strains containing deletions of the TetR DNA binding domain (*clr4-1Δ*) were constructed both by PCR based targeting approaches and crosses followed by random spore analysis. The resulting colonies were tested using allele specific primers. To isolate red colonies that harbor a deletion of the TetR DNA binding domain, sectored colonies, which tested positive for the deletion in the allele specific PCR screen, were replated to isolate single red colonies on plates containing limiting adenine. All strains used in this study are listed in Table S1. Crosses were performed between red isolates of haploid cells of opposite mating type which harbored a deletion of the TetR DNA binding module. The resulting diploid, which lacks any sequence-specific establishment factors, was then allowed to sporulate. Following tetrad dissection, spores were plated on low-adenine medium and allowed to grow at 32°C for 3 days.

### **Chromatin immunoprecipitation (ChIP)**

Cells were grown to a density of  $2.5 \times 10^7$  cells/mL at 32°C in YEA or YEA containing tetracycline (2.5 µg/mL). Cells were crosslinked with 1% formaldehyde for 30 min at room temperature prior to quenching with 125mM glycine for 5 minutes. The subsequent steps for sample processing were performed as previously described (56).

Immunoprecipitation was performed using the following antibodies: 2.5uL  $\alpha$ -H3K9me2 (ab1220, Abcam) for quantifying H3K9me2 levels, 2µg  $\alpha$ -H3K9me3 (57) for quantifying H3K9me3 levels, and 2.5uL  $\alpha$ -FLAG (M2, sigma) for quantifying TetR-Clr4-I occupancy at the ectopic locus before and after addition of tetracycline. DNA purified from the ChIP experiments were analyzed by quantitative PCR using an Applied Biosystems 7900HT Fast Real-Time PCR systems. See Supplemental Table S2 for primer sequences. ChIP-seq libraries were constructed, sequenced using an Illumina High-seq platform, and processed as described previously (49).

### **Silencing assays**

Strains containing the *ade6*<sup>+</sup> reporter construct were grown overnight after which 5-fold dilutions of each culture were spotted on plates containing only yeast extract (YE) and glucose without any additional adenine supplements with (+tet) or without (-tet) tetracycline (2.5 µg/mL). Each silencing assay also included centromeric silencing reporter strains which are unresponsive to tetracycline (*otr1R:ade6*<sup>+</sup> and *ura4::10XtetO-ade6*<sup>+</sup>) as controls to ensure that the addition of tetracycline does not induce any changes in reporter gene expression.

### **FACS analysis**

Cells containing *TetR-clr4-I* and *10XtetO-ura4-GFP* reporter were maintained in log phase ( $\sim 2.5 \times 10^7$  cells/mL) through the course of sample preparation at various time points after addition of tetracycline ( $2.5 \mu\text{g/mL}$ ). Approximately  $2.5 \times 10^7$  cells were harvested and fixed by addition of 70% ethanol for 20 minutes. The cells were then washed twice with 1X TBS (200mM Tris pH 7.5, 150mM NaCl) and resuspended in 1mL of 1X TBS in a FACS tube (BD Falcon). GFP fluorescence was then measured using a FACScalibur instrument (Becton Dickinson) and excitation was achieved by using an argon laser emission of 488 nm. Data collection was performed using Cellquest software (Becton Dickinson) and a primary gate based on physical parameters (forward and side light scatter, FSC and SSC, respectively) was set to exclude dead cells or debris. Typically, 20000 cells were analyzed for each sample and time point. The resulting GFP fluorescence profiles were fit using Gaussian curves (Origin 8.0) assuming a model where cells exhibit two expression states i.e. either GFP-ON or GFP-OFF. The fraction of cells in each state was calculated by measuring the area under the curve for each Gaussian fit.

Fig. S1\_Ragunathan et al.

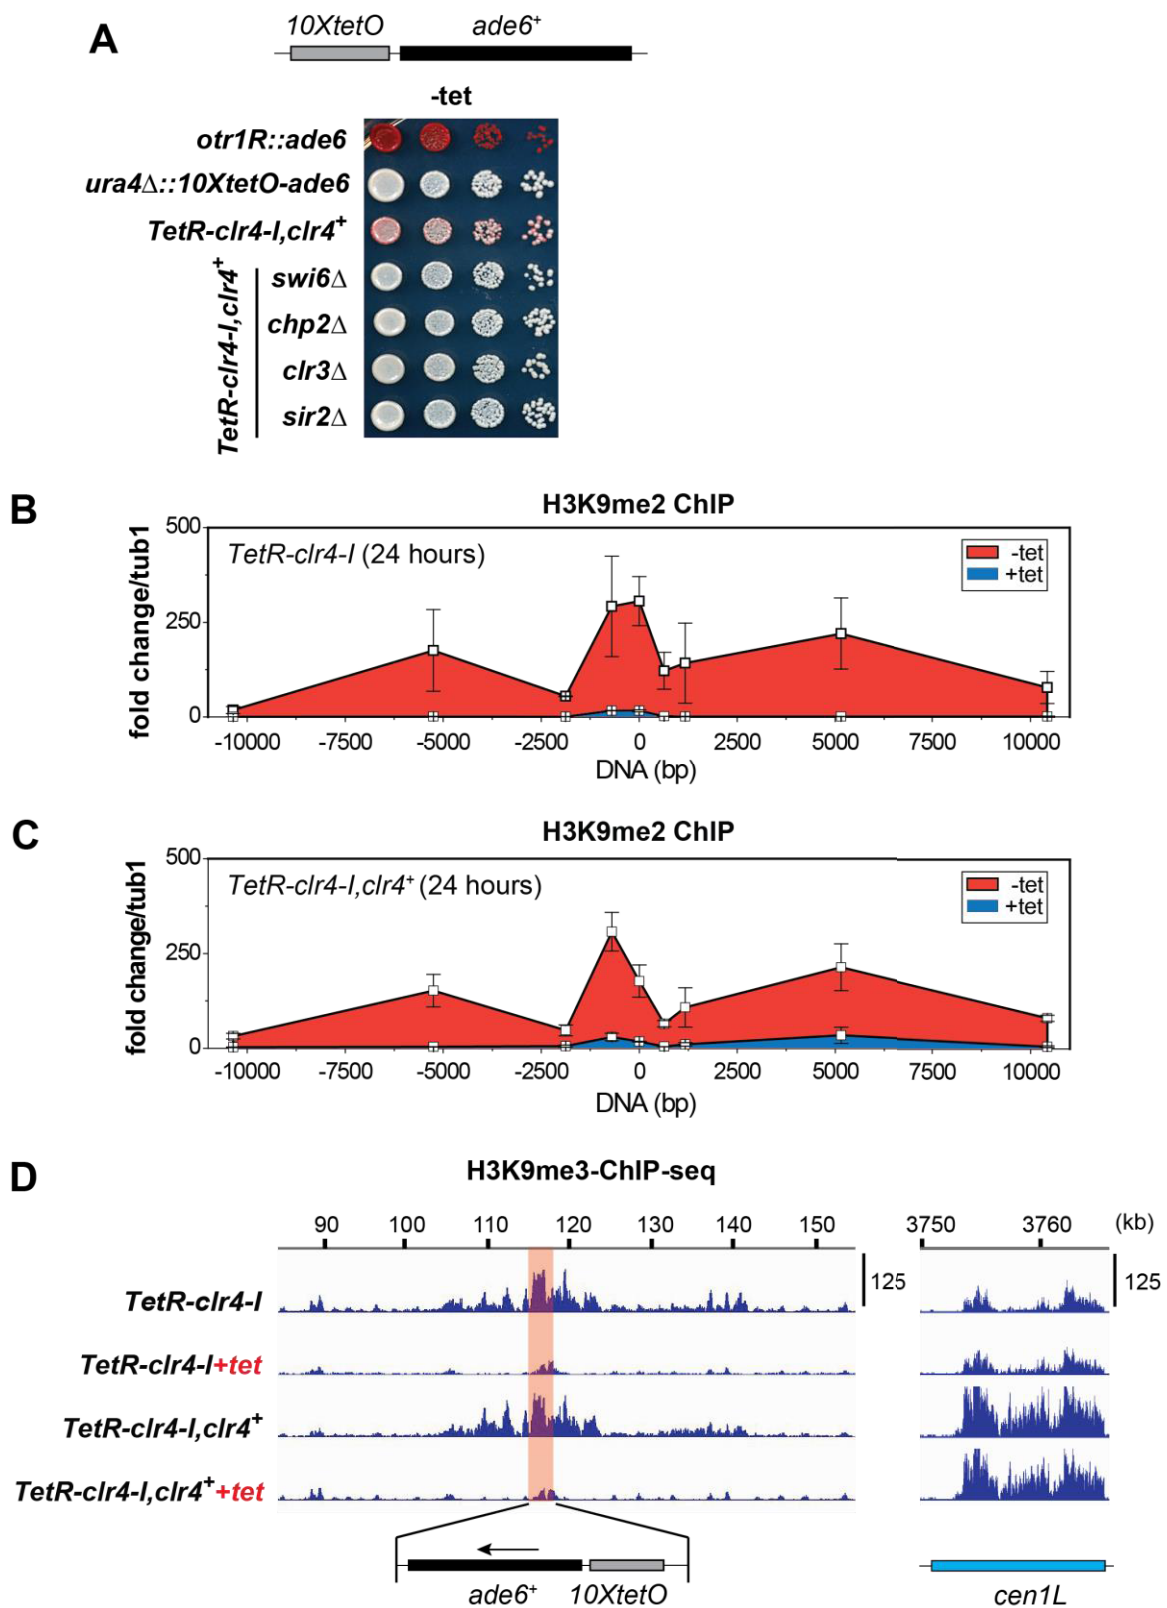

**Fig. S1.**

Genetic requirements for TetR-clr4-I-mediated silencing and its loss after release by tetracycline.

(A) Color silencing assays show that TetR-clr4-I-mediated silencing in *clr4*<sup>+</sup> cells requires HP1 proteins (lost in *swi6Δ* and *chp2Δ*) and histone decetylases (lost in *clr3Δ* and *sir2Δ*). (B, C) H3K9me2 ChIP-qPCR and (D) H3K9me3 ChIP-seq experiments show that TetR-clr4-I induces the formation of a large domain of H3K9me2 that flanks the *10XtetO-ade6*<sup>+</sup> locus for about 20 kb on either side. Both H3K9me2 and H3K9me3 is lost 24 hours after the addition of tetracycline. Reads for the left centromere of chromosome 1 (*cen1*) are shown for comparison. Normalized reads per million are presented (y axis) and chromosome coordinates are indicated on the top.

Fig. S2\_Ragunathan et al.

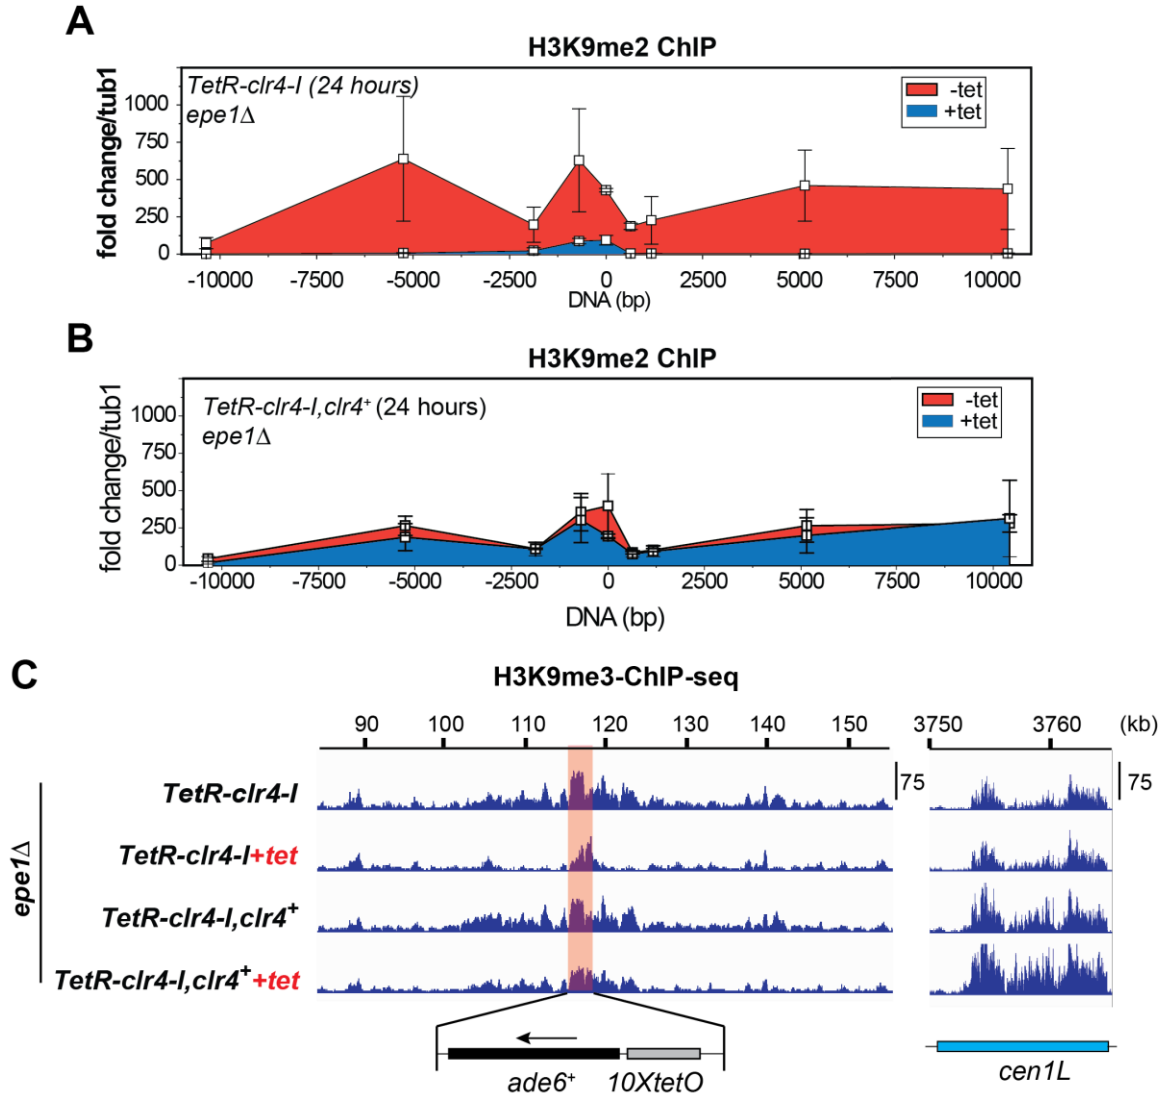

Fig. S2

Maintenance of silencing and H3K9 methylation in *epe1Δ* cells.

(A, B) H3K9me2 ChIP-qPCR and (C) H3K9me3 ChIP-seq experiments show that in *epe1Δ* cells, the H3K9me2 and H3K9me3 domain surrounding the *10XtetO-ade6+* locus is maintained 24 hours after the addition of tetracycline (+tet). Reads for the left centromere of chromosome 1 (*cen1*) are shown for comparison and are presented as described in Fig. S1 legend.





**Fig. S3**

TetR-Clr4-I tethering induces heritable silencing of flanking genes.

(A) Schematic diagram of the annotated open reading frames surrounding the *10XtetO-ura4-GFP* locus. (B-C) qRT-PCR quantification of RNA levels for the indicated loci at 0, 7, and 24 hours after the addition tetracycline.

**Fig. S4\_Ragunathan et al.**

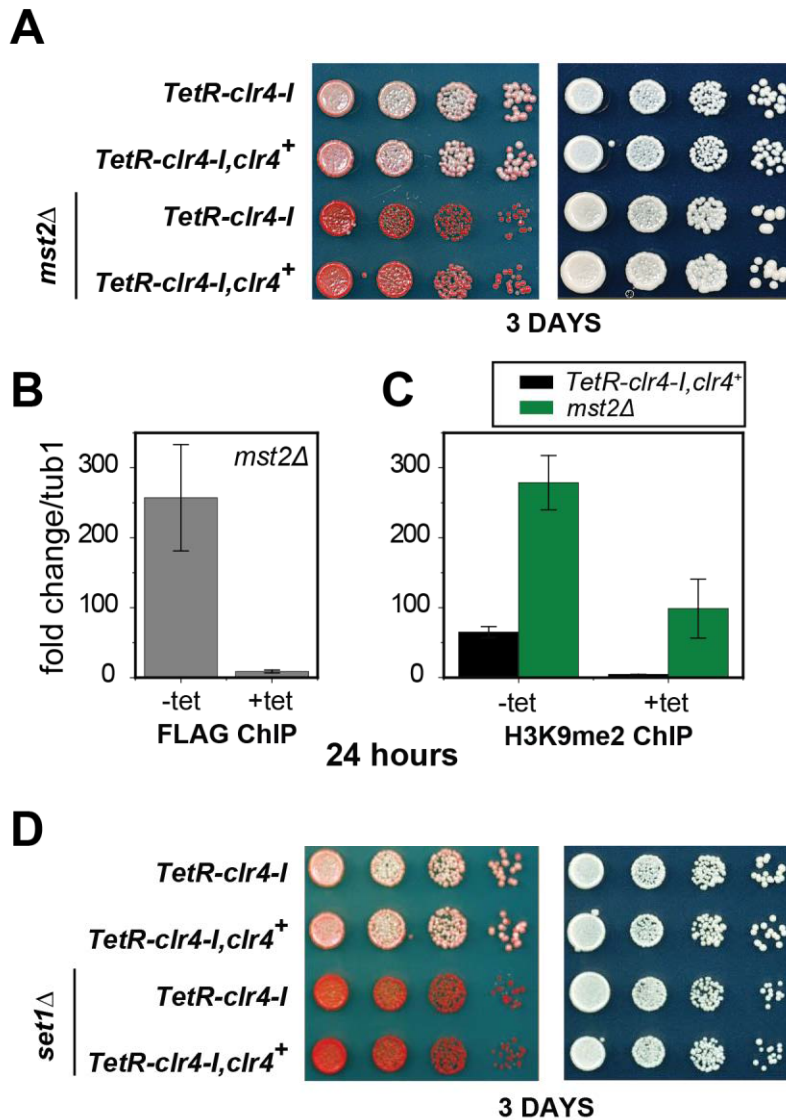

**Fig. S4.**

The effect of deleting enzymes associated with transcriptional activation, *mst2<sup>+</sup>* and *set1<sup>+</sup>*, on the establishment and maintenance of silencing.

(A and D) Color silencing assays show that *mst2Δ* and *set1Δ* cells cause enhanced silencing under conditions of establishment on –tet, which is not maintained on +tet medium. (B) ChIP-qPCR experiments show that tetracycline promotes the release of

FLAG-tagged TetR-Clr4-I from *tetO* sites 24 hours after the addition of tetracycline. (C)  
H3K9me2 is enhanced in *mst2Δ* cells on the absence of tetracycline (-tet) and maintained  
24 hours after tetracycline addition (+tet). Error bars represent standard deviations.

Fig. S5\_Ragunathan et al.

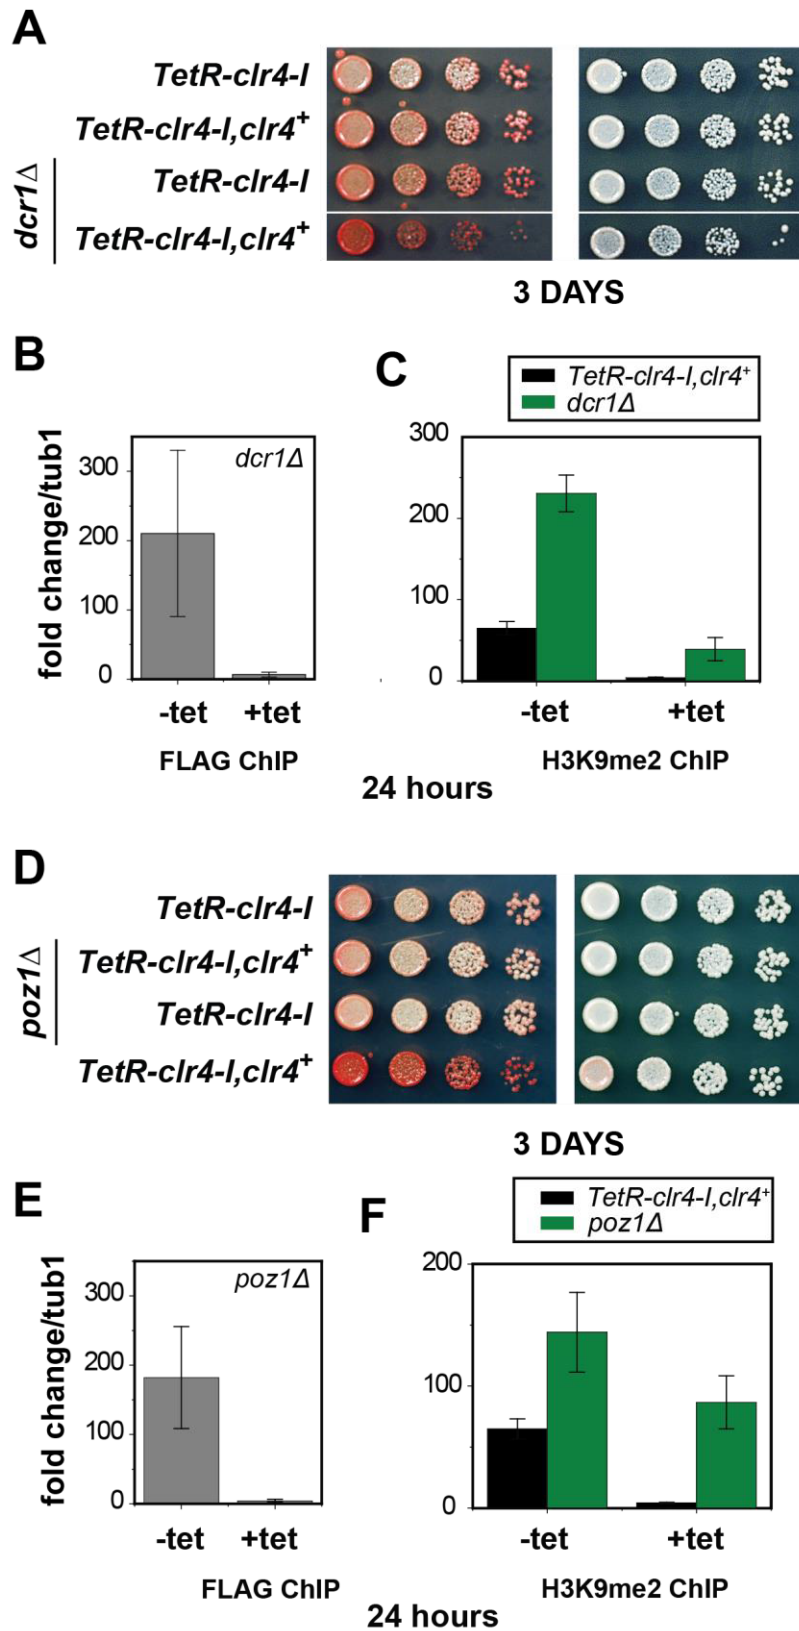

**Fig. S5.**

The effect of mutations in *dcr1*<sup>+</sup> and *poz1*<sup>+</sup> on the establishment and maintenance of H3K9 methylation and silencing.

(A and D) Color silencing assays show that silencing of *10XtetO-ade6*<sup>+</sup> is not maintained on +tet medium in *dcr1Δ* cells (A) and is very weakly maintained in *poz1Δ* cells (D).

ChIP-qPCR experiments show that 24 hours after the addition of tetracycline (+tet) TetR-Clr4-I is released from the *tetO* sites in *dcr1Δ* (B) and *poz1Δ* (E) cells while H3K9me2 is maintained (C and F). Error bars represent standard deviations.

**Fig. S6\_Ragunathan et al.**

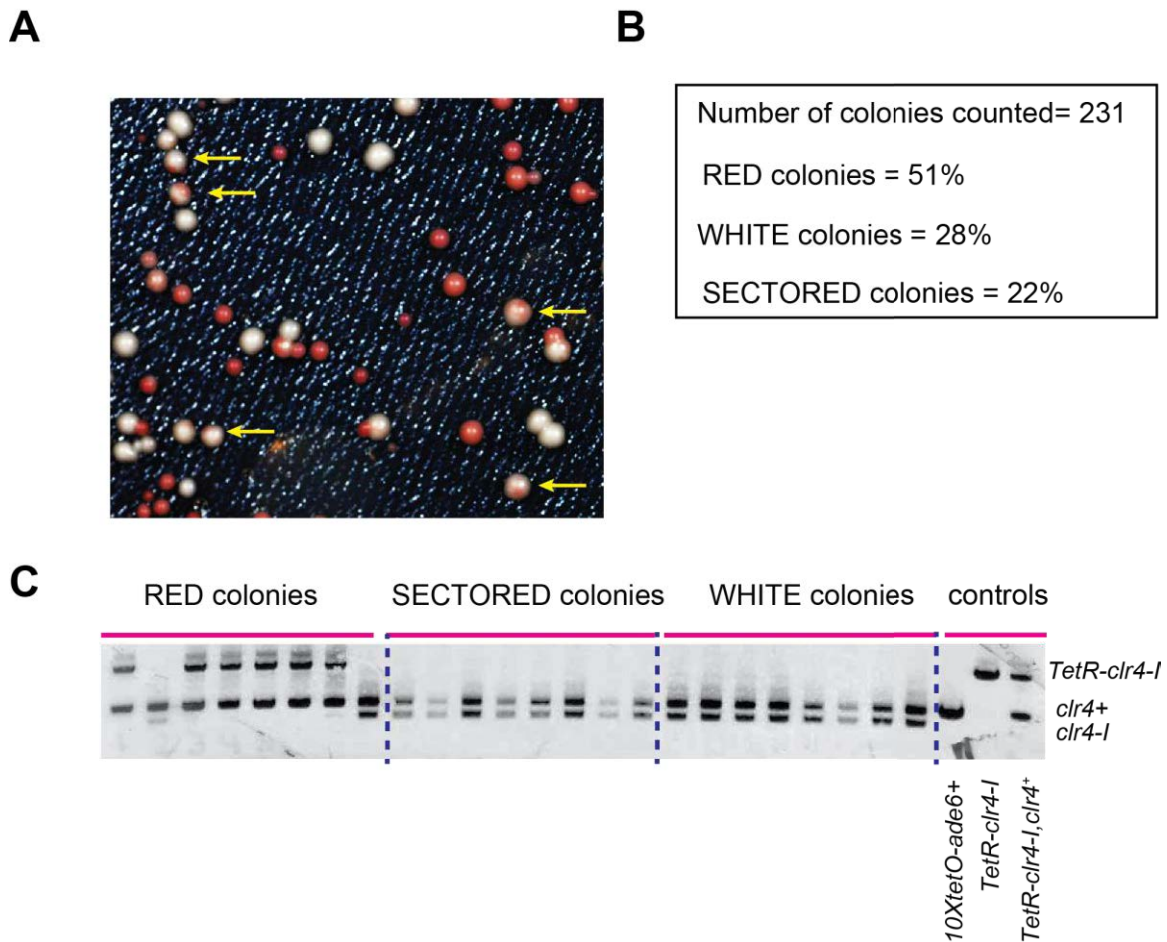

**Fig. S6.**

Maintenance of *10XtetO-ade6*<sup>+</sup> silencing after deletion of the TetR DNA binding domain.

(A) Growth of *10XtetO-ade6*<sup>+</sup>, *nat*<sup>R</sup>-*TetR-clr4-I*, *clr4*<sup>+</sup>, *epe1*Δ cells, transformed with a PCR DNA fragment to replace *nat*<sup>R</sup>-*TetR-clr4-I* with *hph*<sup>R</sup>-*clr4-I*Δ, on hygromycin-containing low-adenine medium. The resulting transformants produced red, white, and sectored colonies. Importantly white and sectored colonies constituted nearly half of all transformants, about 22% of which were sectored (B). Allele-specific PCR confirmed that both the white (representing loss of the silent state) and sectored (representing

maintenance of the silent state) colonies contained the expected replacement of the *TetR-clr4-I* allele with *clr4-I* at a very high frequency (C). The resulting *clr4-I* is designated *clr-IΔ* to reflect the deletion of the TetR DNA-binding domain.



Ragunathan et al.\_Fig. S7

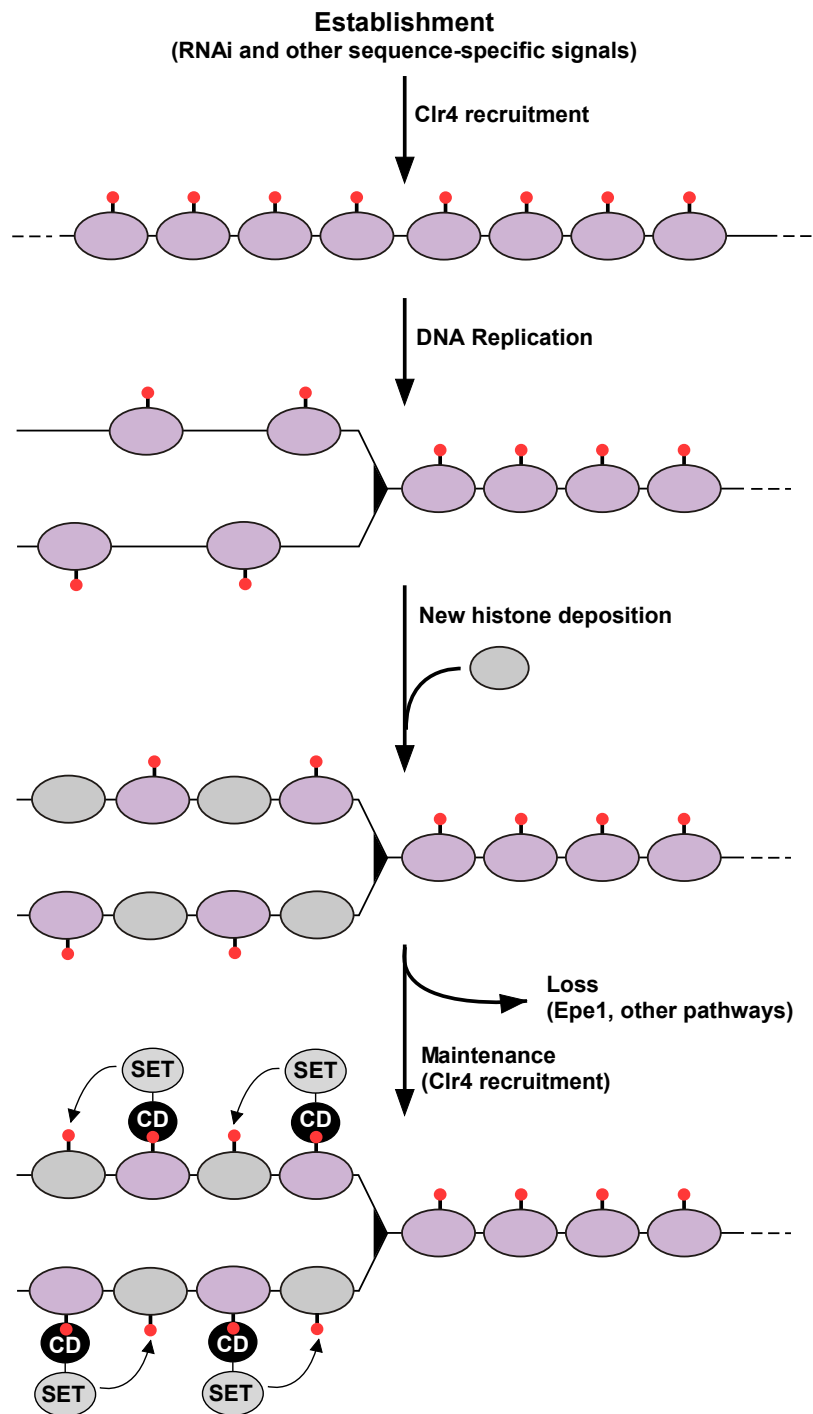

**Fig. S7.**

Establishment and epigenetic maintenance of H3K9 methylation.

H3K9 methylated domains (denoted by filled red circles on oval nucleosomes) and silent chromatin are established by RNAi or other sequence-specific signals that recruit the Clr4 methyltransferase. Following DNA replication, H3K9 methylation is copied from parental nucleosomes to newly deposited nucleosomes by a direct “read-write” mechanism that involves the recognition of methylated nucleosomes by the chromodomain of Clr4 (Maintenance). H3K9 methylation can be reversed due to the activity of Epe1 or other pathways that promote nucleosome exchange (Loss).

**Table S1.****Strains used in this study**

|         |                                                                                                                                                                      |            |
|---------|----------------------------------------------------------------------------------------------------------------------------------------------------------------------|------------|
| SPY77   | <i>h- leu1-32 ade6-M210</i>                                                                                                                                          | Lab stock  |
| SPY1964 | <i>h- leu1-32 ura4-D18</i>                                                                                                                                           | Lab stock  |
| SPY5081 | <i>h<sup>-</sup> leu1-32 ade6-M210 ura4Δ::10XTetO-ade6<sup>+</sup></i>                                                                                               | This study |
| SPY5288 | <i>h<sup>-</sup> leu1-32 ade6-M210 ura4Δ::10XTetO-ade6<sup>+</sup><br/>epe1Δ::kanMX6</i>                                                                             | This study |
| SPY5285 | <i>h<sup>-</sup> leu1-32 ade6-M210 ura4Δ::ade6<sup>+</sup> clr4Δ.natMX6-P<sub>clr4</sub>-<br/>TetR-2XFLAG-clr4-I</i>                                                 | This study |
| SPY5286 | <i>h<sup>-</sup> leu1-32 ade6-M210 ura4Δ::ade6<sup>+</sup> clr4<sup>+</sup> trp1.natMX6-<br/>P<sub>clr4</sub>-TetR-2XFLAG-clr4-I</i>                                 | This study |
| SPY5073 | <i>h<sup>-</sup> leu1-32 ade6-M210 ura4Δ::10XTetO-ade6<sup>+</sup><br/>clr4Δ.natMX6-P<sub>clr4</sub>-TetR-2XFLAG-clr4-I</i>                                          | This study |
| SPY5075 | <i>h<sup>-</sup> leu1-32 ade6+-M210 ura4Δ::10XTetO-ade6<sup>+</sup> clr4<sup>+</sup><br/>trp1.natMX6-P<sub>clr4</sub>-TetR-2XFLAG-clr4-I</i>                         | This study |
| SPY5079 | <i>h<sup>-</sup> leu1-32 ade6+-M210 ura4Δ::10XTetO-ade6<sup>+</sup> clr4<sup>+</sup><br/>trp1.natMX6-P<sub>clr4</sub>-TetR-2XFLAG-clr4-I dcr1Δ::hphMX6</i>           | This study |
| SPY5289 | <i>h<sup>-</sup> leu1-32 ade6+-M210 ura4Δ::10XTetO-ade6<sup>+</sup> clr4<sup>+</sup><br/>trp1.natMX6-P<sub>clr4</sub>-TetR-2XFLAG-clr4-I swi6Δ::hphMX6</i>           | This study |
| SPY5290 | <i>h<sup>-</sup> leu1-32 ade6+-M210 ura4Δ::10XTetO-ade6<sup>+</sup> clr4<sup>+</sup><br/>trp1.natMX6-P<sub>clr4</sub>-TetR-2XFLAG-clr4-I chp2Δ::hphMX6</i>           | This study |
| SPY5293 | <i>h<sup>-</sup> leu1-32 ade6+-M210 ura4Δ::10XTetO-ade6<sup>+</sup> clr4<sup>+</sup><br/>trp1.natMX6-P<sub>clr4</sub>-TetR-2XFLAG-clr4-I clr3Δ::hphMX6</i>           | This study |
| SPY5291 | <i>h<sup>-</sup> leu1-32 ade6+-M210 ura4Δ::10XTetO-ade6<sup>+</sup> clr4<sup>+</sup><br/>trp1.natMX6-P<sub>clr4</sub>-TetR-2XFLAG-clr4-I sir2Δ::hphMX6</i>           | This study |
| SPY5320 | <i>h<sup>-</sup> leu1-32 ade6+-M210 ura4Δ::10XTetO-ade6<sup>+</sup><br/>clr4Δ.natMX6-P<sub>clr4</sub>-TetR-2XFLAG-clr4-I poz1Δ::kanMX6</i>                           | This study |
| SPY5321 | <i>h<sup>+</sup> leu1-32 ade6+-M210 ura4Δ::10XTetO-ade6<sup>+</sup> clr4<sup>+</sup><br/>trp1.natMX6-P<sub>clr4</sub>-TetR-2XFLAG-clr4-I poz1Δ::kanMX6</i>           | This study |
| SPY5083 | <i>h<sup>-</sup> leu1-32 ade6+-M210 ura4Δ::10XTetO-ade6<sup>+</sup><br/>clr4Δ.natMX6-P<sub>clr4</sub>-TetR-2XFLAG-clr4-I mst2Δ::ura4<sup>+</sup></i>                 | This study |
| SPY5084 | <i>h<sup>-</sup> leu1-32 ade6+-M210 ura4Δ::10XTetO-ade6<sup>+</sup> clr4<sup>+</sup><br/>trp1.natMX6-P<sub>clr4</sub>-TetR-2XFLAG-clr4-I mst2Δ::ura4<sup>+</sup></i> | This study |
| SPY5305 | <i>h<sup>+</sup> leu1-32 ade6+-M210 ura4Δ::10XTetO-ade6<sup>+</sup><br/>clr4Δ.natMX6-P<sub>clr4</sub>-TetR-2XFLAG-clr4-I set1Δ::kanMX6</i>                           | This study |
| SPY5306 | <i>h<sup>-</sup> leu1-32 ade6+-M210 ura4Δ::10XTetO-ade6<sup>+</sup> clr4<sup>+</sup><br/>trp1.natMX6-P<sub>clr4</sub>-TetR-2XFLAG-clr4-I set1Δ::kanMX6</i>           | This study |
| SPY5086 | <i>h<sup>-</sup> leu1-32 ade6+-M210 ura4Δ::10XTetO-ade6<sup>+</sup><br/>clr4Δ.natMX6-P<sub>clr4</sub>-TetR-2XFLAG-clr4-I epe1Δ::kanMX6</i>                           | This study |
| SPY5090 | <i>h<sup>-</sup> leu1-32 ade6+-M210 ura4Δ::10XTetO-ade6<sup>+</sup> clr4<sup>+</sup><br/>trp1.natMX6-P<sub>clr4</sub>-TetR-2XFLAG-clr4-I epe1Δ::kanMX6</i>           | This study |
| SPY5093 | <i>h<sup>-</sup> leu1-32 ade6+-M210 ura4Δ::10XTetO-ade6<sup>+</sup> clr4<sup>+</sup><br/>trp1.natMX6-P<sub>clr4</sub>-TetR-2XFLAG-clr4-I epe1Δ::kanMX6</i>           | This study |

|         |                                                                                                                                                                                                        |            |
|---------|--------------------------------------------------------------------------------------------------------------------------------------------------------------------------------------------------------|------------|
|         | <i>dcr1Δ::hphMX6</i>                                                                                                                                                                                   |            |
| SPY5295 | <i>h<sup>-</sup> leu1-32 ade6<sup>+</sup>-M210 ura4Δ::10XTetO- ade6<sup>+</sup> clr4<sup>+</sup> trp1.natMX6-P<sub>clr4</sub>-TetR-2XFLAG-clr4-I epe1Δ::kanMX6 swi6Δ::hphMX6</i>                       | This study |
| SPY5297 | <i>h<sup>-</sup> leu1-32 ade6<sup>+</sup>-M210 ura4Δ::10XTetO- ade6<sup>+</sup> clr4<sup>+</sup> trp1.natMX6-P<sub>clr4</sub>-TetR-2XFLAG-clr4-I epe1Δ::kanMX6 chp2Δ::hphMX6</i>                       | This study |
| SPY5300 | <i>h<sup>-</sup> leu1-32 ade6<sup>+</sup>-M210 ura4Δ::10XTetO- ade6<sup>+</sup> clr4<sup>+</sup> trp1.natMX6-P<sub>clr4</sub>-TetR-2XFLAG-clr4-I epe1Δ::kanMX6 clr3Δ::hphMX6</i>                       | This study |
| SPY5298 | <i>h<sup>-</sup> leu1-32 ade6<sup>+</sup>-M210 ura4Δ::10XTetO- ade6<sup>+</sup> clr4<sup>+</sup> trp1.natMX6-P<sub>clr4</sub>-TetR-2XFLAG-clr4-I epe1Δ::kanMX6 sir2Δ::hphMX6</i>                       | This study |
| SPY5309 | <i>h<sup>-</sup> leu1-32 ade6<sup>+</sup>-M210 ura4Δ::10XTetO- ade6<sup>+</sup> clr4<sup>+</sup> Δ::hphMX6- P<sub>clr4</sub>-clr4IΔ trp1.natMX6-P<sub>clr4</sub>-TetR-2XFLAG-clr4-I</i>                | This study |
| SPY5307 | <i>h<sup>-</sup> leu1-32 ade6<sup>+</sup>-M210 ura4Δ::10XTetO- ade6<sup>+</sup> clr4<sup>+</sup> Δ::hphMX6- P<sub>clr4</sub>-clr4IΔ trp1.natMX6-P<sub>clr4</sub>-TetR-2XFLAG-clr4-I epe1 Δ::kanMX6</i> | This study |
| SPY5099 | <i>h<sup>-</sup> leu1-32 ade6<sup>+</sup>-M210 ura4Δ::10XTetO-ura4-GFP</i>                                                                                                                             | This study |
| SPY5101 | <i>h<sup>-</sup> leu1-32 ade6<sup>+</sup>-M210 ura4Δ::10XTetO-ura4-GFP clr4Δ.natMX6-P<sub>clr4</sub>-TetR-2XFLAG-clr4-I</i>                                                                            | This study |
| SPY5103 | <i>SPY5103 h<sup>-</sup> leu1-32 ade6<sup>+</sup>-M210 ura4Δ::10XTetO-ura4-GFP clr4<sup>+</sup> trp1.natMX6-P<sub>clr4</sub>-TetR-2XFLAG-clr4-I</i>                                                    | This study |
| SPY5314 | <i>SPY5314 h<sup>-</sup> leu1-32 ade6<sup>+</sup>-M210 ura4Δ::10XTetO-ura4-GFP clr4Δ.natMX6-P<sub>clr4</sub>-TetR-2XFLAG-clr4-I epe1Δ::kanMX6</i>                                                      | This study |
| SPY5317 | <i>h<sup>-</sup> leu1-32 ade6<sup>+</sup>-M210 ura4Δ::10XTetO-ura4-GFP clr4<sup>+</sup> trp1.natMX6-P<sub>clr4</sub>-TetR-2XFLAG-clr4-I epe1Δ::kanMX6</i>                                              | This study |
| SPY5355 | <i>h<sup>-</sup> leu1-32 ade6<sup>+</sup>-M210 ura4Δ::10XTetO- ade6<sup>+</sup> clr4<sup>+</sup> trp1.natMX6-P<sub>clr4</sub>-TetR-2XFLAG-clr4-I ago1Δ::hphMX6</i>                                     | This study |
| SPY5361 | <i>h<sup>-</sup> leu1-32 ade6<sup>+</sup>-M210 ura4Δ::10XTetO- ade6<sup>+</sup> clr4<sup>+</sup> trp1.natMX6-P<sub>clr4</sub>-TetR-2XFLAG-clr4-I epe1Δ::kanMX6 ago1Δ::hphMX6</i>                       | This study |
| SPY5410 | <i>h<sup>-</sup> leu1-32 ade6<sup>+</sup>-M210 ura4Δ::10XTetO- ade6<sup>+</sup> clr4<sup>+</sup> trp1.natMX6-P<sub>clr4</sub>-TetR-2XFLAG-clr4-I epe1-K314A-3XFLAG-hphMX6</i>                          | This study |
| SPY5412 | <i>h<sup>-</sup> leu1-32 ade6<sup>+</sup>-M210 ura4Δ::10XTetO- ade6<sup>+</sup> clr4<sup>+</sup> trp1.natMX6-P<sub>clr4</sub>-TetR-2XFLAG-clr4-I epe1-H297A-3XFLAG-hphMX6</i>                          | This study |
| SPY28   | <i>h<sup>+</sup> leu1-32 ura4-D18 imr1R(Ncol)::ura4<sup>+</sup> oriI ade6-M216</i>                                                                                                                     | Lab stock  |
| SPY825  | <i>h<sup>+</sup> leu1-32 ura4-D18 imr1R(Ncol)::ura4<sup>+</sup> oriI ade6-</i>                                                                                                                         | Lab stock  |

|                |                                                                                                                                                        |            |
|----------------|--------------------------------------------------------------------------------------------------------------------------------------------------------|------------|
|                | <i>M216 clr4Δ::kanMX6</i>                                                                                                                              |            |
| <i>SPY86</i>   | <i>h<sup>+</sup> leu1-32 ura4-D18 imr1R(Ncol)::ura4<sup>+</sup> oriI ade6-M216 dcr1Δ::TAP-kanMX6</i>                                                   | Lab stock  |
| <i>SPY120</i>  | <i>h<sup>+</sup> leu1-32 ura4-D18 imr1R(Ncol)::ura4<sup>+</sup> oriI ade6-M216 ago1Δ::TAP-kanMX6</i>                                                   | Lab stock  |
| <i>SPY2765</i> | <i>h<sup>+</sup> leu1-32 ura4-D18 imr1R(Ncol)::ura4<sup>+</sup> oriI ade6-M216 ago1Δ::TAP-kanMX6 clr4Δ::nat → hph-5'UTR(1kb)-clr4</i>                  | This study |
| <i>SPY2768</i> | <i>h<sup>+</sup> leu1-32 ura4-D18 imr1R(Ncol)::ura4<sup>+</sup> oriI ade6-M216 dcr1Δ::TAP-kanMX6 clr4Δ::nat → hph-5'UTR(1kb)-clr4</i>                  | This study |
| <i>SPY4453</i> | <i>h<sup>+</sup> leu1-32 ura4-D18 imr1R(Ncol)::ura4<sup>+</sup> oriI ade6-M216 ago1Δ::kanMX6 trp1::natMX6-P<sub>clr4</sub>-3XFLAG-clr4<sup>+</sup></i> | This study |
| <i>SPY4485</i> | <i>h<sup>+</sup> leu1-32 ura4-D18 imr1R(Ncol)::ura4<sup>+</sup> oriI ade6-M216 ago1Δ::kanMX6 trp1::natMX6-P<sub>clr4</sub>-3XFLAG-clr4 (W31G)</i>      | This study |

**Table S2.****Primers used in this study**

|                      |                             |                       |
|----------------------|-----------------------------|-----------------------|
| 10XtetO_binding-fwd  | GCAGTGGTGCTTCTGTCCTAACAGC   | FLAG, K9me2 qChIP     |
| 10XtetO_binding-rev  | GTCCGTGTAGCTCGAGCTCGACTT    | FLAG, K9me2 qChIP     |
| 10XtetO-600bp-fwd    | GCGGTACGAAGATGATTTTGCACA    | qChIP (-600bp ura4)   |
| 10XtetO-600bp-rev    | TGCTGCAATTATTGCTGCTTCTTCC   | qChIP (-600bp ura4)   |
| 10XtetO-1900bp-fwd   | TAGCAACAGTGGCGACAGGGAC      | qChIP (-1900bp ura4)  |
| 10XtetO-1900bp-rev   | CCGCAGCTTCAAGAGGGTTGC       | qChIP (-1900bp ura4)  |
| 10XtetO-5000bp-fwd   | CTTTGGGGGCAGTTTGTGGC        | qChIP (-5000bp ura4)  |
| 10XtetO-5000bp-rev   | CGTCGCC GATCAAGGGTTGA       | qChIP (-5000bp ura4)  |
| 10XtetO-10000bp- fwd | GTTGAATTCAACGGAATGTC        | qChIP (-10000bp ura4) |
| 10XtetO-10000bp-rev  | CGTCTCGAGTGCATTTGATGCG      | qChIP (-10000bp ura4) |
| 10XtetO+100bp-fwd    | AAGTCGAGCTCGAGCTACACGGAC    | qChIP (+100bp ura4)   |
| 10XtetO+100bp-rev    | CTGGATTTTCGTTTACCTCACCACCA  | qChIP (+100bp ura4)   |
| 10XtetO+700bp-fwd    | TTGCAGGAGAGGGTTCAACAGCA     | qChIP (+700bp ura4)   |
| 10XtetO+700bp-rev    | AATGCATCATCTTGGATGCAGCAA    | qChIP (+700bp ura4)   |
| 10XtetO+1200bp-fwd   | TGTGAGGCCGAGGAGCAATTC       | qChIP (+1200bp ura4)  |
| 10XtetO+1200bp-rev   | TATGCCCTGCTCGTCTTCCCT       | qChIP (+1200bp ura4)  |
| 10XtetO+5000bp-fwd   | GAGCCTCATGTCCATACGATCAACCT  | qChIP (+5000bp ura4)  |
| 10XtetO+5000bp-rev   | AATCGATGGATGAGTGGAGAAAGTCG  | qChIP (+5000bp ura4)  |
| 10XtetO+10000bp-fwd  | CCTGATGCCCTCAAATCGGTTACTT   | qChIP (+10000bp ura4) |
| 10XtetO+10000bp-rev  | TGAGGCTGTTCAAGGAAGTTAGTGTCC | qChIP (+10000bp ura4) |
| GJ195                | GGTTAAAGCGGTTGTTTGGCACTG    | qChIP                 |
| GJ196                | TGACGAGGCACATTCCTTATACGC    | qChIP                 |
| tub1_ref-fwd         | AACGCTTGGCCATGGAATACACG     | qChIP                 |

|                       |                            |                     |
|-----------------------|----------------------------|---------------------|
| tub1_ref-rev          | GAGAGGCGGTGATGGAAGAAACAAC  | qChIP               |
| +10kb SPCC330.19c-rev | CGCCCGACAAGTTGGGCAT        | qRT-PCR             |
| +10kb SPCC330.19c-fwd | TCATACCGCTTGTCTTGCTTTTTGC  | qRT-PCR             |
| -10kb SPCC330.09-fwd  | AAGGCGTAACCCAACGCTTACCTAA  | qRT-PCR             |
| -10kb SPCC330.09-rev  | TGAGGTTTGTACACACCAGTTGCCA  | qRT-PCR             |
| -2kb SPCC330.06c-fwd  | GCCGTAAATGACGTTTTTCGTCACC  | qRT-PCR             |
| -2kb SPCC330.06c-rev  | ACCTTGACAACCTTGCCATTCTCG   | qRT-PCR             |
| act1Fwd2              | CAACCCTCAGCTTTGGGTCTTG     | qRT-PCR             |
| act1Rev2              | TCCTTTTGCATACGATCGGCAATAC  | qRT-PCR             |
| ura4set5F             | TACAGTGCCAGGCGAGGGTATTAT   | qRT-PCR             |
| ura4set5R             | TAGGAACCAGTAGCCAAAGAGCCT   | qRT-PCR             |
| Clr4promoter-fwd      | CGCGGTCGTCTATTATTTTAGTCC   | allele specific PCR |
| Clr4internal-rev      | TCGAGATTGTCTCTTGGTAGTTTGAG | allele specific PCR |

## References and Notes

1. L. Ringrose, R. Paro, Epigenetic regulation of cellular memory by the Polycomb and Trithorax group proteins. *Annu. Rev. Genet.* **38**, 413–443 (2004). [Medline](#) [doi:10.1146/annurev.genet.38.072902.091907](https://doi.org/10.1146/annurev.genet.38.072902.091907)
2. D. Moazed, Mechanisms for the inheritance of chromatin states. *Cell* **146**, 510–518 (2011). [Medline](#) [doi:10.1016/j.cell.2011.07.013](https://doi.org/10.1016/j.cell.2011.07.013)
3. K. Luger, A. W. Mäder, R. K. Richmond, D. F. Sargent, T. J. Richmond, Crystal structure of the nucleosome core particle at 2.8 Å resolution. *Nature* **389**, 251–260 (1997). [Medline](#) [doi:10.1038/38444](https://doi.org/10.1038/38444)
4. T. Jenuwein, C. D. Allis, Translating the histone code. *Science* **293**, 1074–1080 (2001). [Medline](#) [doi:10.1126/science.1063127](https://doi.org/10.1126/science.1063127)
5. B. Li, M. Carey, J. L. Workman, The role of chromatin during transcription. *Cell* **128**, 707–719 (2007). [Medline](#) [doi:10.1016/j.cell.2007.01.015](https://doi.org/10.1016/j.cell.2007.01.015)
6. T. Kouzarides, Chromatin modifications and their function. *Cell* **128**, 693–705 (2007). [Medline](#) [doi:10.1016/j.cell.2007.02.005](https://doi.org/10.1016/j.cell.2007.02.005)
7. S. L. Schreiber, B. E. Bernstein, Signaling network model of chromatin. *Cell* **111**, 771–778 (2002). [Medline](#) [doi:10.1016/S0092-8674\(02\)01196-0](https://doi.org/10.1016/S0092-8674(02)01196-0)
8. O. J. Rando, Combinatorial complexity in chromatin structure and function: Revisiting the histone code. *Curr. Opin. Genet. Dev.* **22**, 148–155 (2012). [Medline](#) [doi:10.1016/j.gde.2012.02.013](https://doi.org/10.1016/j.gde.2012.02.013)
9. V. Jackson, R. Chalkley, Separation of newly synthesized nucleohistone by equilibrium centrifugation in cesium chloride. *Biochemistry* **13**, 3952–3956 (1974). [Medline](#) [doi:10.1021/bi00716a021](https://doi.org/10.1021/bi00716a021)
10. J. M. Sogo, H. Stahl, T. Koller, R. Knippers, Structure of replicating simian virus 40 minichromosomes. The replication fork, core histone segregation and terminal structures. *J. Mol. Biol.* **189**, 189–204 (1986). [Medline](#) [doi:10.1016/0022-2836\(86\)90390-6](https://doi.org/10.1016/0022-2836(86)90390-6)
11. M. Radman-Livaja, K. F. Verzijlbergen, A. Weiner, T. van Welsem, N. Friedman, O. J. Rando, F. van Leeuwen, Patterns and mechanisms of ancestral histone protein inheritance in budding yeast. *PLOS Biol.* **9**, e1001075 (2011). [Medline](#) [doi:10.1371/journal.pbio.1001075](https://doi.org/10.1371/journal.pbio.1001075)
12. A. V. Probst, E. Dunleavy, G. Almouzni, Epigenetic inheritance during the cell cycle. *Nat. Rev. Mol. Cell Biol.* **10**, 192–206 (2009). [Medline](#) [doi:10.1038/nrm2640](https://doi.org/10.1038/nrm2640)
13. B. D. Strahl, C. D. Allis, The language of covalent histone modifications. *Nature* **403**, 41–45 (2000). [Medline](#) [doi:10.1038/47412](https://doi.org/10.1038/47412)
14. B. M. Turner, Histone acetylation and an epigenetic code. *BioEssays* **22**, 836–845 (2000). [Medline](#) [doi:10.1002/1521-1878\(200009\)22:9<836::AID-BIES9>3.0.CO;2-X](https://doi.org/10.1002/1521-1878(200009)22:9<836::AID-BIES9>3.0.CO;2-X)
15. M. Ptashne, On the use of the word ‘epigenetic’. *Curr. Biol.* **17**, R233–R236 (2007). [Medline](#) [doi:10.1016/j.cub.2007.02.030](https://doi.org/10.1016/j.cub.2007.02.030)



16. R. Margueron, D. Reinberg, Chromatin structure and the inheritance of epigenetic information. *Nat. Rev. Genet.* **11**, 285–296 (2010). [Medline doi:10.1038/nrg2752](#)
17. T. H. Cheng, M. R. Gartenberg, Yeast heterochromatin is a dynamic structure that requires silencers continuously. *Genes Dev.* **14**, 452–463 (2000). [Medline](#)
18. S. G. Holmes, J. R. Broach, Silencers are required for inheritance of the repressed state in yeast. *Genes Dev.* **10**, 1021–1032 (1996). [Medline doi:10.1101/gad.10.8.1021](#)
19. A. K. Sengupta, A. Kuhrs, J. Müller, General transcriptional silencing by a Polycomb response element in *Drosophila*. *Development* **131**, 1959–1965 (2004). [Medline doi:10.1242/dev.01084](#)
20. A. Busturia, C. D. Wightman, S. Sakonju, A silencer is required for maintenance of transcriptional repression throughout *Drosophila* development. *Development* **124**, 4343–4350 (1997). [Medline](#)
21. M. Bühler, S. M. Gasser, Silent chromatin at the middle and ends: Lessons from yeasts. *EMBO J.* **28**, 2149–2161 (2009). [Medline doi:10.1038/emboj.2009.185](#)
22. R. C. Allshire, J. P. Javerzat, N. J. Redhead, G. Cranston, Position effect variegation at fission yeast centromeres. *Cell* **76**, 157–169 (1994). [Medline doi:10.1016/0092-8674\(94\)90180-5](#)
23. S. I. Grewal, A. J. Klar, Chromosomal inheritance of epigenetic states in fission yeast during mitosis and meiosis. *Cell* **86**, 95–101 (1996). [Medline doi:10.1016/S0092-8674\(00\)80080-X](#)
24. J. Nakayama, A. J. Klar, S. I. Grewal, A chromodomain protein, Swi6, performs imprinting functions in fission yeast during mitosis and meiosis. *Cell* **101**, 307–317 (2000). [Medline doi:10.1016/S0092-8674\(00\)80840-5](#)
25. C. T. Chien, S. Buck, R. Sternglanz, D. Shore, Targeting of SIR1 protein establishes transcriptional silencing at HM loci and telomeres in yeast. *Cell* **75**, 531–541 (1993). [Medline doi:10.1016/0092-8674\(93\)90387-6](#)
26. A. Kagansky, H. D. Folco, R. Almeida, A. L. Pidoux, A. Boukaba, F. Simmer, T. Urano, G. L. Hamilton, R. C. Allshire, Synthetic heterochromatin bypasses RNAi and centromeric repeats to establish functional centromeres. *Science* **324**, 1716–1719 (2009). [Medline doi:10.1126/science.1172026](#)
27. M. Gossen, H. Bujard, Tight control of gene expression in mammalian cells by tetracycline-responsive promoters. *Proc. Natl. Acad. Sci. U.S.A.* **89**, 5547–5551 (1992). [Medline doi:10.1073/pnas.89.12.5547](#)
28. B. D. Reddy, Y. Wang, L. Niu, E. C. Higuchi, S. B. Marguerat, J. Bähler, G. R. Smith, S. Jia, Elimination of a specific histone H3K14 acetyltransferase complex bypasses the RNAi pathway to regulate pericentric heterochromatin functions. *Genes Dev.* **25**, 214–219 (2011). [Medline doi:10.1101/gad.1993611](#)
29. X. Tadeo, J. Wang, S. P. Kallgren, J. Liu, B. D. Reddy, F. Qiao, S. Jia, Elimination of shelterin components bypasses RNAi for pericentric heterochromatin assembly. *Genes Dev.* **27**, 2489–2499 (2013). [Medline doi:10.1101/gad.226118.113](#)

30. S. C. Trewick, E. Minc, R. Antonelli, T. Urano, R. C. Allshire, The JmjC domain protein Epe1 prevents unregulated assembly and disassembly of heterochromatin. *EMBO J.* **26**, 4670–4682 (2007). [Medline doi:10.1038/sj.emboj.7601892](#)
31. Y. Tsukada, J. Fang, H. Erdjument-Bromage, M. E. Warren, C. H. Borchers, P. Tempst, Y. Zhang, Histone demethylation by a family of JmjC domain-containing proteins. *Nature* **439**, 811–816 (2006). [Medline doi:10.1038/nature04433](#)
32. E. B. Gómez, J. M. Espinosa, S. L. Forsburg, *Schizosaccharomyces pombe mst2<sup>+</sup>* encodes a MYST family histone acetyltransferase that negatively regulates telomere silencing. *Mol. Cell. Biol.* **25**, 8887–8903 (2005). [Medline doi:10.1128/MCB.25.20.8887-8903.2005](#)
33. A. Roguev, D. Schaft, A. Shevchenko, R. Aasland, A. Shevchenko, A. F. Stewart, High conservation of the Set1/Rad6 axis of histone 3 lysine 4 methylation in budding and fission yeasts. *J. Biol. Chem.* **278**, 8487–8493 (2003). [Medline doi:10.1074/jbc.M209562200](#)
34. T. Miyoshi, J. Kanoh, M. Saito, F. Ishikawa, Fission yeast Pot1-Tpp1 protects telomeres and regulates telomere length. *Science* **320**, 1341–1344 (2008). [Medline](#)
35. T. A. Volpe, C. Kidner, I. M. Hall, G. Teng, S. I. Grewal, R. A. Martienssen, Regulation of heterochromatic silencing and histone H3 lysine-9 methylation by RNAi. *Science* **297**, 1833–1837 (2002). [Medline doi:10.1126/science.1074973](#)
36. M. Sadaie, T. Iida, T. Urano, J. Nakayama, A chromodomain protein, Chp1, is required for the establishment of heterochromatin in fission yeast. *EMBO J.* **23**, 3825–3835 (2004). [Medline doi:10.1038/sj.emboj.7600401](#)
37. M. Halic, D. Moazed, Dicer-independent primal RNAs trigger RNAi and heterochromatin formation. *Cell* **140**, 504–516 (2010). [Medline doi:10.1016/j.cell.2010.01.019](#)
38. F. E. Reyes-Turcu, K. Zhang, M. Zofall, E. Chen, S. I. Grewal, Defects in RNA quality control factors reveal RNAi-independent nucleation of heterochromatin. *Nat. Struct. Mol. Biol.* **18**, 1132–1138 (2011). [Medline doi:10.1038/nsmb.2122](#)
39. J. Nakayama, J. C. Rice, B. D. Strahl, C. D. Allis, S. I. Grewal, Role of histone H3 lysine 9 methylation in epigenetic control of heterochromatin assembly. *Science* **292**, 110–113 (2001). [Medline doi:10.1126/science.1060118](#)
40. K. Zhang, K. Mosch, W. Fischle, S. I. Grewal, Roles of the Clr4 methyltransferase complex in nucleation, spreading and maintenance of heterochromatin. *Nat. Struct. Mol. Biol.* **15**, 381–388 (2008). [Medline doi:10.1038/nsmb.1406](#)
41. E. Heard, R. A. Martienssen, Transgenerational epigenetic inheritance: Myths and mechanisms. *Cell* **157**, 95–109 (2014). [Medline doi:10.1016/j.cell.2014.02.045](#)
42. S. G. Gu, J. Pak, S. Guang, J. M. Maniar, S. Kennedy, A. Fire, Amplification of siRNA in *Caenorhabditis elegans* generates a transgenerational sequence-targeted histone H3 lysine 9 methylation footprint. *Nat. Genet.* **44**, 157–164 (2012). [Medline doi:10.1038/ng.1039](#)
43. X. Zhong, J. Du, C. J. Hale, J. Gallego-Bartolome, S. Feng, A. A. Vashisht, J. Chory, J. A. Wohlschlegel, D. J. Patel, S. E. Jacobsen, Molecular mechanism of action of plant DRM

- de novo DNA methyltransferases. *Cell* **157**, 1050–1060 (2014). [Medline](#)  
[doi:10.1016/j.cell.2014.03.056](https://doi.org/10.1016/j.cell.2014.03.056)
44. M. R. Motamedi, A. Verdel, S. U. Colmenares, S. A. Gerber, S. P. Gygi, D. Moazed, Two RNAi complexes, RITS and RDRC, physically interact and localize to noncoding centromeric RNAs. *Cell* **119**, 789–802 (2004). [Medline](#) [doi:10.1016/j.cell.2004.11.034](https://doi.org/10.1016/j.cell.2004.11.034)
45. J. A. Law, S. E. Jacobsen, Establishing, maintaining and modifying DNA methylation patterns in plants and animals. *Nat. Rev. Genet.* **11**, 204–220 (2010). [Medline](#)  
[doi:10.1038/nrg2719](https://doi.org/10.1038/nrg2719)
46. N. A. Hathaway, O. Bell, C. Hodges, E. L. Miller, D. S. Neel, G. R. Crabtree, Dynamics and memory of heterochromatin in living cells. *Cell* **149**, 1447–1460 (2012). [Medline](#)  
[doi:10.1016/j.cell.2012.03.052](https://doi.org/10.1016/j.cell.2012.03.052)
47. B. S. Wheeler, B. T. Ruderman, H. F. Willard, K. C. Scott, Uncoupling of genomic and epigenetic signals in the maintenance and inheritance of heterochromatin domains in fission yeast. *Genetics* **190**, 549–557 (2012). [Medline](#) [doi:10.1534/genetics.111.137083](https://doi.org/10.1534/genetics.111.137083)
48. T. Iida, J. Nakayama, D. Moazed, siRNA-mediated heterochromatin establishment requires HP1 and is associated with antisense transcription. *Mol. Cell* **31**, 178–189 (2008).  
[Medline](#) [doi:10.1016/j.molcel.2008.07.003](https://doi.org/10.1016/j.molcel.2008.07.003)
49. R. Yu, G. Jih, N. Iglesias, D. Moazed, Determinants of heterochromatic siRNA biogenesis and function. *Mol. Cell* **53**, 262–276 (2014). [Medline](#) [doi:10.1016/j.molcel.2013.11.014](https://doi.org/10.1016/j.molcel.2013.11.014)
50. Y. Shi, J. R. Whetstine, Dynamic regulation of histone lysine methylation by demethylases. *Mol. Cell* **25**, 1–14 (2007). [Medline](#) [doi:10.1016/j.molcel.2006.12.010](https://doi.org/10.1016/j.molcel.2006.12.010)
51. A. Baba, F. Ohtake, Y. Okuno, K. Yokota, M. Okada, Y. Imai, M. Ni, C. A. Meyer, K. Igarashi, J. Kanno, M. Brown, S. Kato, PKA-dependent regulation of the histone lysine demethylase complex PHF2-ARID5B. *Nat. Cell Biol.* **13**, 668–675 (2011). [Medline](#)  
[doi:10.1038/ncb2228](https://doi.org/10.1038/ncb2228)
52. Y. H. Loh, W. Zhang, X. Chen, J. George, H. H. Ng, Jmjd1a and Jmjd2c histone H3 Lys 9 demethylases regulate self-renewal in embryonic stem cells. *Genes Dev.* **21**, 2545–2557 (2007). [Medline](#) [doi:10.1101/gad.1588207](https://doi.org/10.1101/gad.1588207)
53. D. B. Lyons, W. E. Allen, T. Goh, L. Tsai, G. Barnea, S. Lomvardas, An epigenetic trap stabilizes singular olfactory receptor expression. *Cell* **154**, 325–336 (2013). [Medline](#)  
[doi:10.1016/j.cell.2013.06.039](https://doi.org/10.1016/j.cell.2013.06.039)
54. D. G. Gibson, L. Young, R. Y. Chuang, J. C. Venter, C. A. Hutchison III, H. O. Smith, Enzymatic assembly of DNA molecules up to several hundred kilobases. *Nat. Methods* **6**, 343–345 (2009). [Medline](#) [doi:10.1038/nmeth.1318](https://doi.org/10.1038/nmeth.1318)
55. J. Bähler, J. Q. Wu, M. S. Longtine, N. G. Shah, A. McKenzie III, A. B. Steever, A. Wach, P. Philippsen, J. R. Pringle, Heterologous modules for efficient and versatile PCR-based gene targeting in *Schizosaccharomyces pombe*. *Yeast* **14**, 943–951 (1998). [Medline](#)  
[doi:10.1002/\(SICI\)1097-0061\(199807\)14:10<943::AID-YEA292>3.0.CO;2-Y](https://doi.org/10.1002/(SICI)1097-0061(199807)14:10<943::AID-YEA292>3.0.CO;2-Y)
56. E. D. Egan, C. R. Braun, S. P. Gygi, D. Moazed, Post-transcriptional regulation of meiotic genes by a nuclear RNA silencing complex. *RNA* **20**, 867–881 (2014). [Medline](#)  
[doi:10.1261/rna.044479.114](https://doi.org/10.1261/rna.044479.114)

57. T. Hattori, J. M. Taft, K. M. Swist, H. Luo, H. Witt, M. Slattery, A. Koide, A. J. Ruthenburg, K. Krajewski, B. D. Strahl, K. P. White, P. J. Farnham, Y. Zhao, S. Koide, Recombinant antibodies to histone post-translational modifications. *Nat. Methods* **10**, 992–995 (2013).  
[Medline](#) [doi:10.1038/nmeth.2605](https://doi.org/10.1038/nmeth.2605)
